# Supplementary material for: Deformable fibrous carbon supported ultrafine nano-SnO2 as a high volumetric capacity and cyclic durable anode for Li storage
Source: Royal Society of Chemistry journal article supplement (doi:10.1039/c5ta03401a), 2015-01-01
Supplement: c5ta03401a1.pdf [file c5ta03401a1.pdf]

## Supporting Information

### **Deformable fibrous carbon supported ultrafine nano-SnO<sub>2</sub> as a high volumetric capacity and cyclic durable anode for Li storage**

*Renzong Hu<sup>1,2</sup>, Hanyin Zhang<sup>1</sup>, Jiangwen Liu<sup>1</sup>, Dongchang Chen<sup>2</sup>, Lichun Yang<sup>1</sup>, Min Zhu<sup>1\*</sup>, and Meilin Liu<sup>2\*</sup>*

<sup>1</sup>Guangdong Provincial Key Laboratory of Advanced Energy Storage Materials, School of Materials Science and Engineering, South China University of Technology, Guangzhou, 510640, China  
E-mail: [memzhu@scut.edu.cn](mailto:memzhu@scut.edu.cn)

<sup>2</sup> School of Materials Science and Engineering, Georgia Institute of Technology, Atlanta, GA 30332-0245, US  
E-mail: [meilin.liu@mse.gatech.edu](mailto:meilin.liu@mse.gatech.edu)

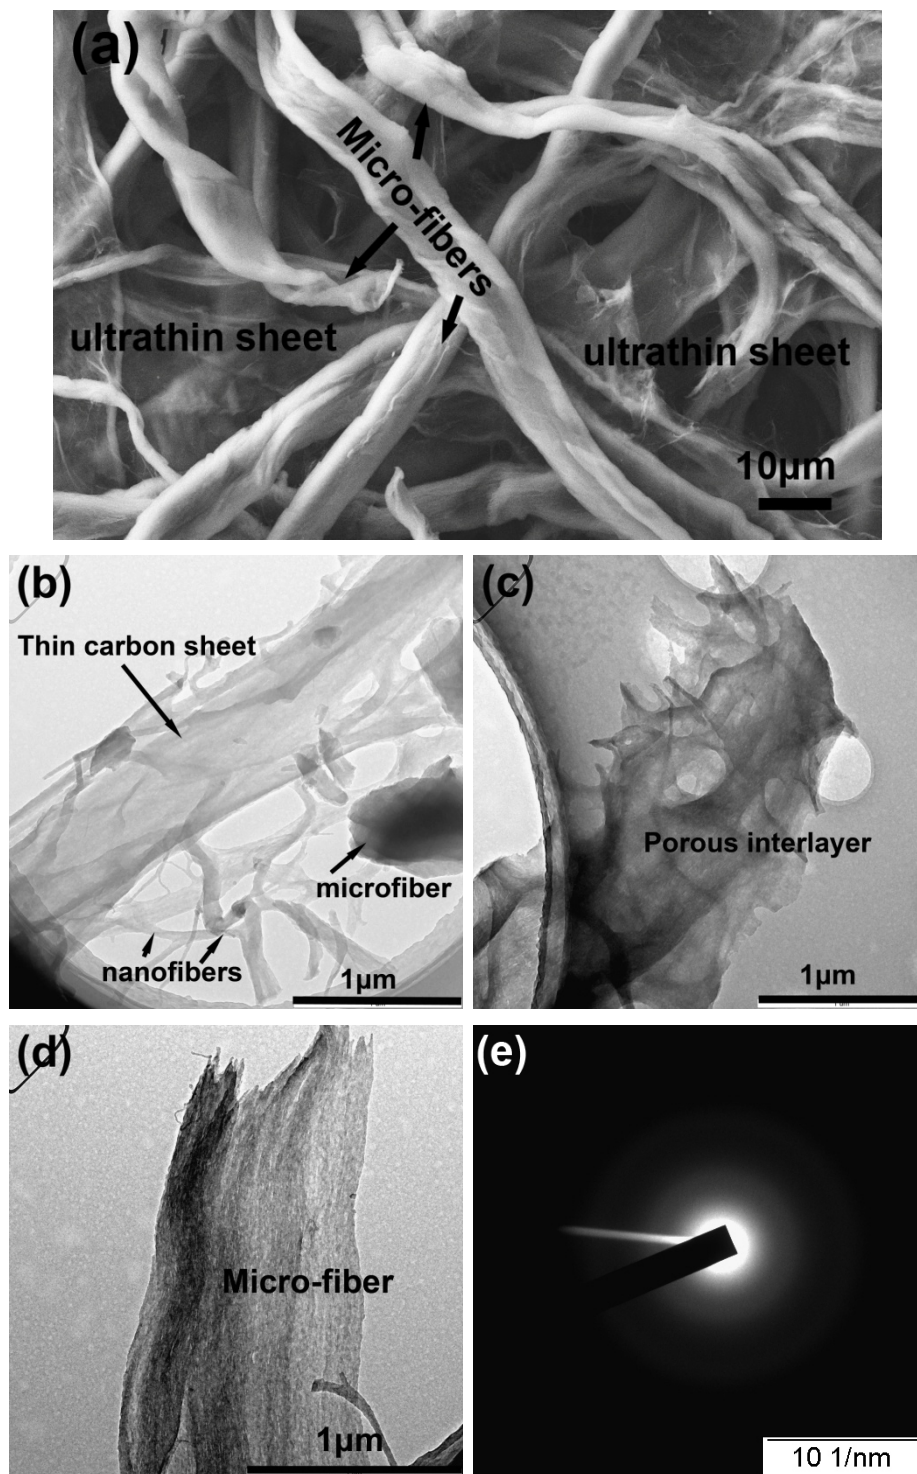

**Figure S1.**(a) SEM image for the as-obtained CFP, showing its interconnected 3D porous structure, there were many 2D ultrathin carbon sheets covered on the fibers; (b) TEM image for the 1D micro/nanofibers, and the thin carbon sheet of the CFP; (c) TEM image for the interconnected porous structure of the interlayer of the CFP; (d) TEM image of a microfiber, showing that it consisted of a large amount of nanofibers; (e) SAED of the CFP, confirmed its amorphous nature.

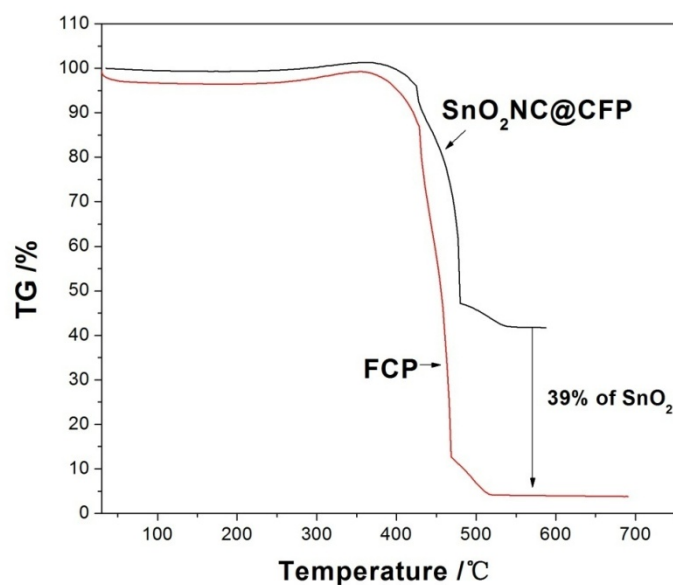

**Figure S2.** TG analysis curves of the CFP and SnO<sub>2</sub>NC@CFP hybrid under O<sub>2</sub> atmosphere at a heating rate of 10°Cmin<sup>-1</sup>

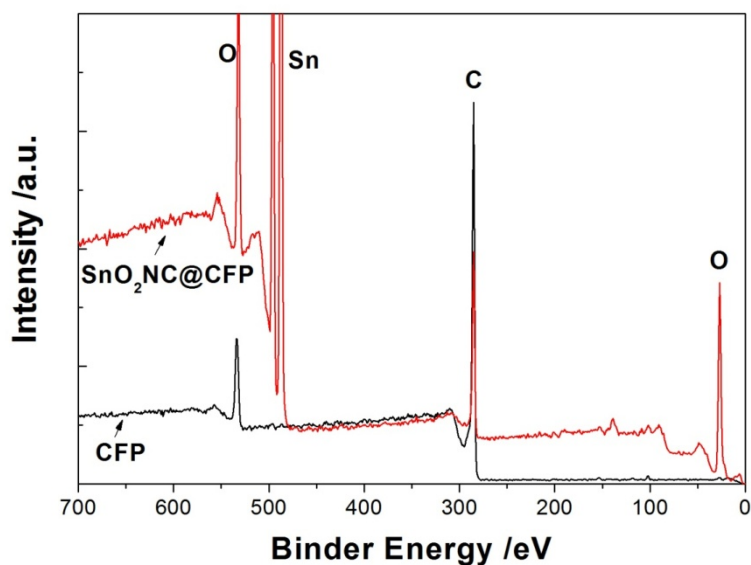

**Figure S3.** XPS survey scan of the CFP and SnO<sub>2</sub>NC@CFP, showing the existence of Sn and increase of oxygen content in the SnO<sub>2</sub>NC@CFP

**Table S1.** element content evaluation based on the XPS analysis in Figure S2

|                         | C1s (at.%) | O1s(at.%) | Sn3d5(at.%) |
|-------------------------|------------|-----------|-------------|
| CFP                     | 86.08      | 13.92     | —           |
| SnO <sub>2</sub> NC@CFP | 44.86      | 39.11     | 16.03       |

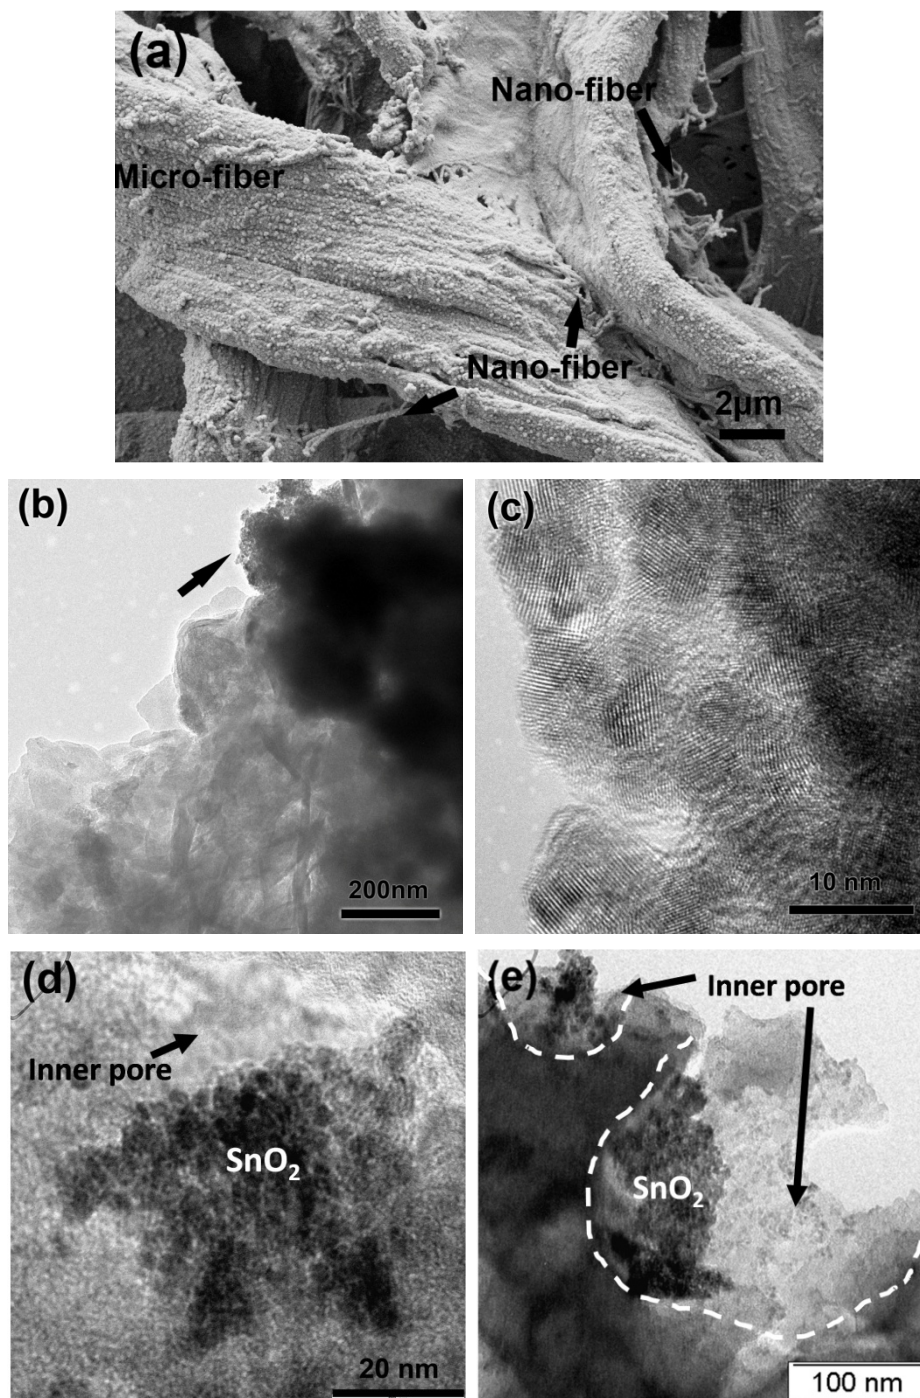

**Figure S4.** (a) SEM image for the as-obtained SnO<sub>2</sub>NC@CFP hybrid, it was found that micro-sized fiber bundles tended to divide to nano-fibers; (b) TEM and (c) HRTEM image for a part of the hybrid, showing ultrafine SnO<sub>2</sub> nanocrystals bonded on the surfaces of the micro/nanosized carbon fibers; (d) and (e) TEM images for the inner pores of the hybrid, showing the aggregations of SnO<sub>2</sub> nanocrystals **in** the pores, with free-space to accommodate the volume change of these nanosized SnO<sub>2</sub> aggregates.

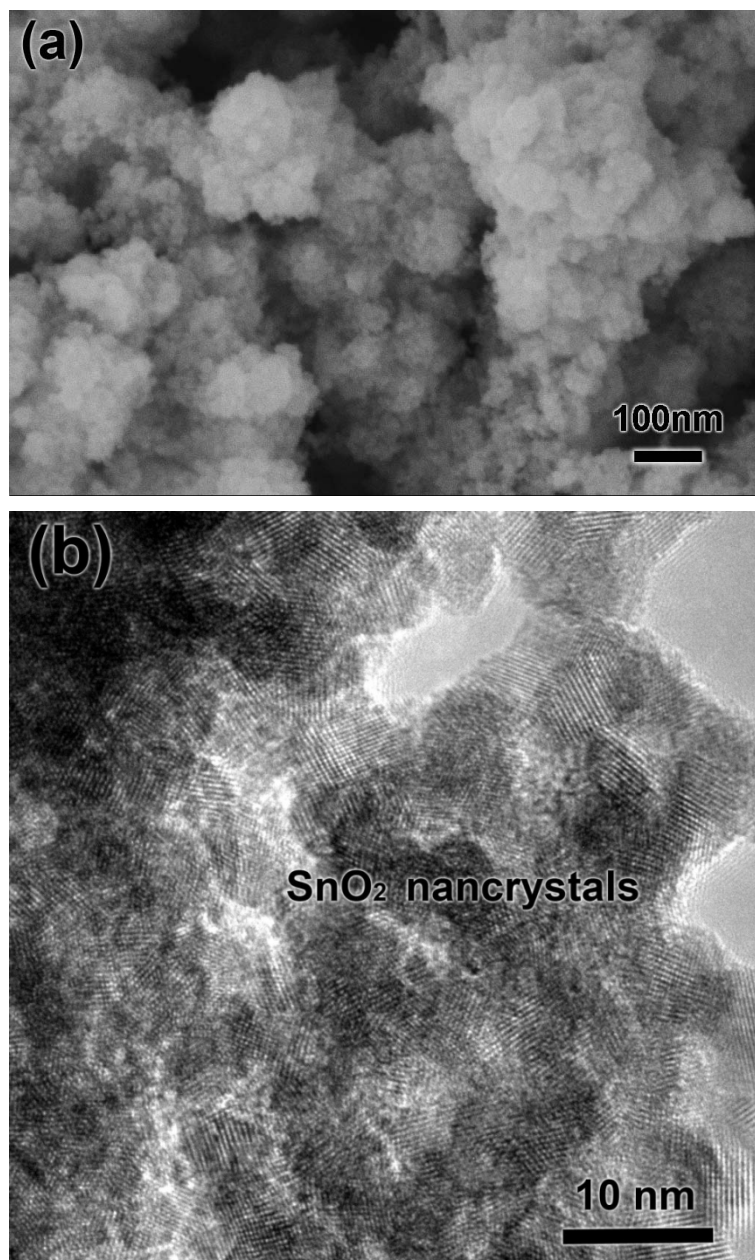

**Figure S5.** (a) SEM image and (b) HTEM image for the Pure SnO<sub>2</sub>NC powders formed during the deposition, which was collected from the solution near under the CFP working electrodes, indicating that the SnO<sub>2</sub> were ultrafine nanocrystals however they were aggregated together.

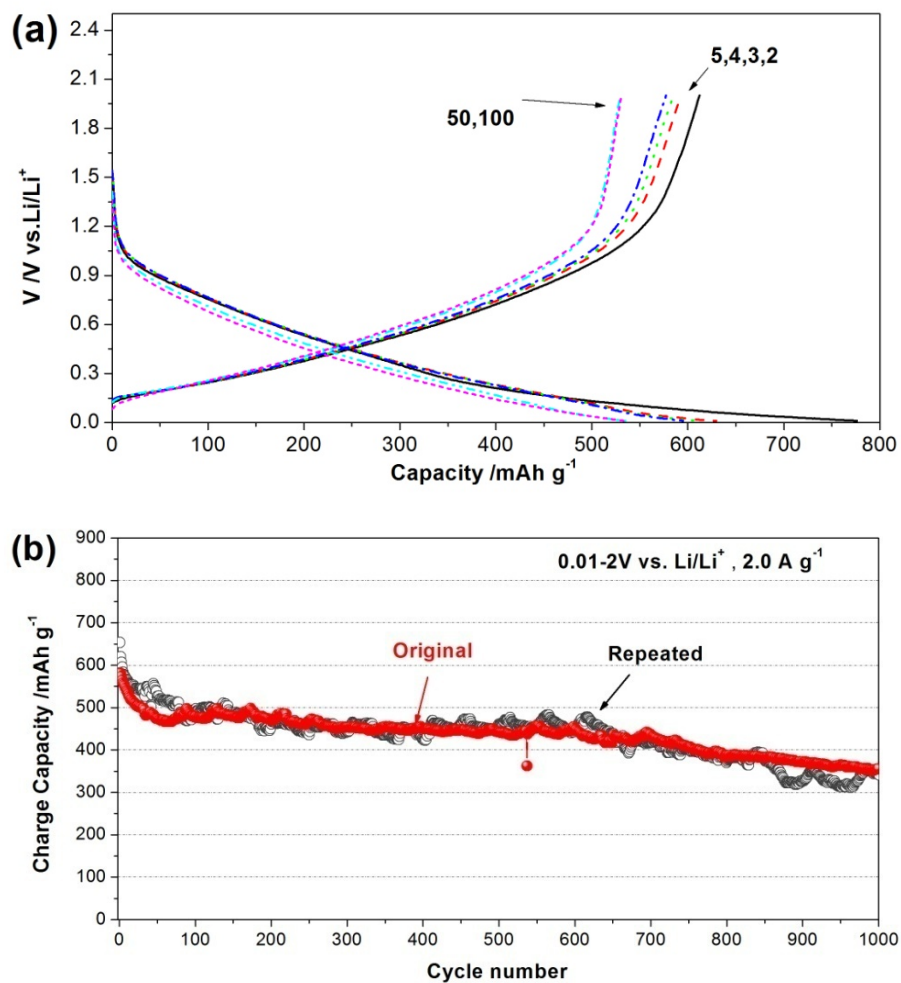

**Figure S6** (a) Discharge-charge curves at representative cycles of the slurry-coating  $\text{SnO}_2\text{NC@CFP}$  electrode; (b) Long term cycle performance of the slurry-coating  $\text{SnO}_2\text{NC@CFP}$  hybrid at current rate of  $2.0 \text{ A g}^{-1}$  between 0.01 and 2V vs.  $\text{Li/Li}^+$ .

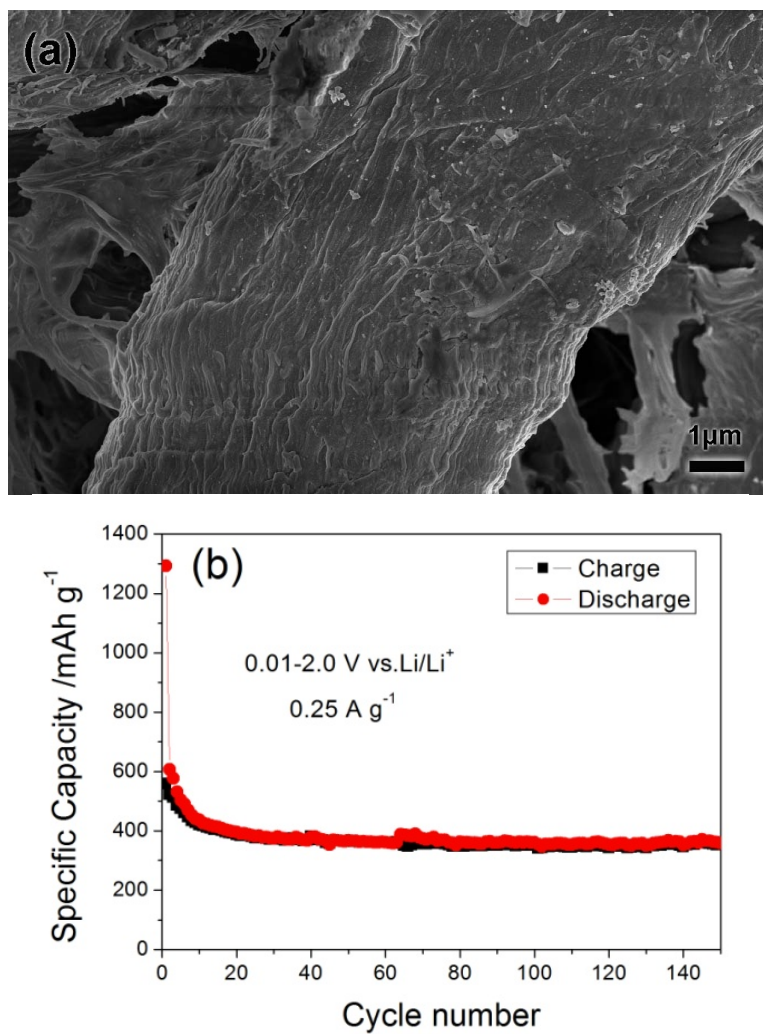

**Figure S7** (a) SEM image, and (b) cycle performance of a binder-free  $\text{SnO}_2@\text{CFP}$  sample with a lower  $\text{SnO}_2$  content of 23wt%.

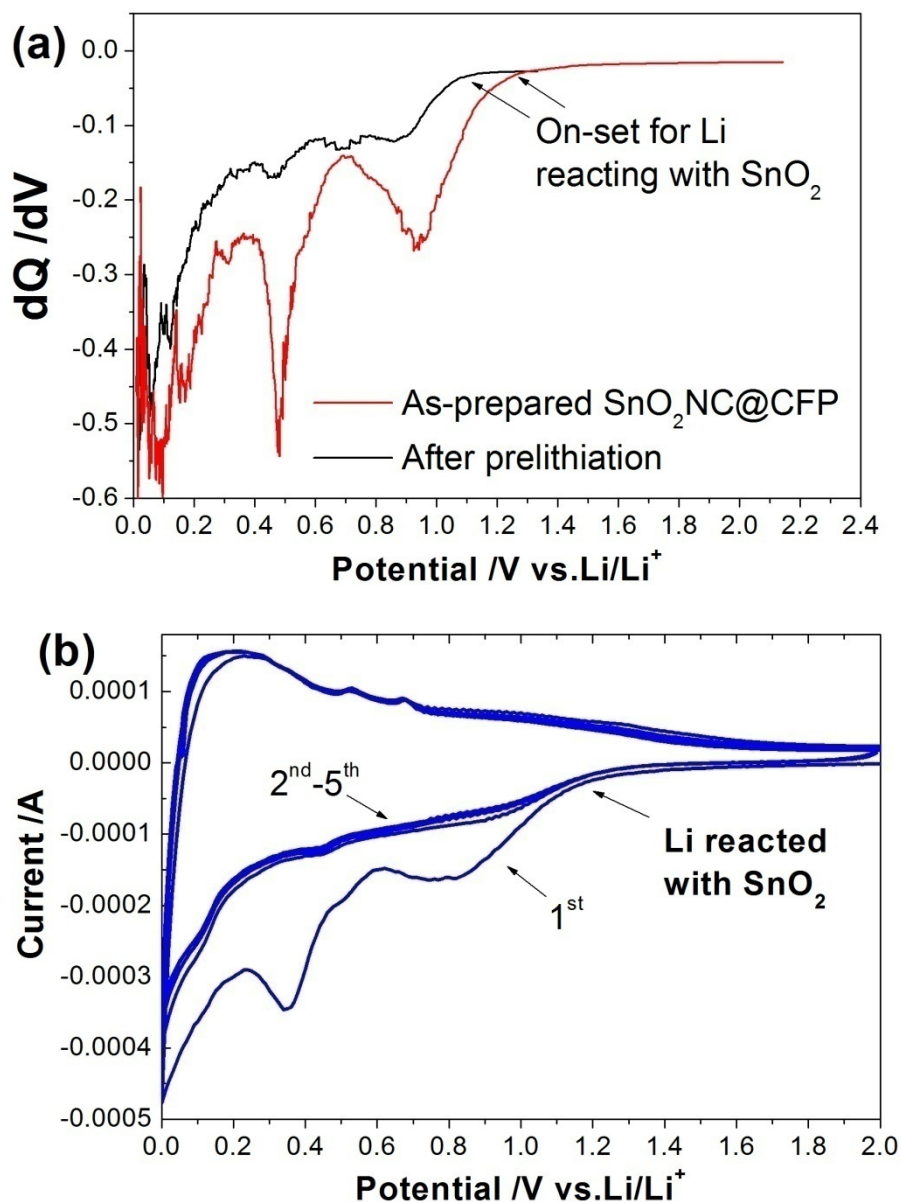

**Figure S8** (a) Comparison for the differential initial discharge curves of the as-prepared and prelithiation hybrids, revealing that less  $\text{SnO}_2$  reacted with Li during initial discharging of the prelithiation electrode; (b) cyclic voltammogram curves for the as-prepared  $\text{SnO}_2\text{NC@CFP}$  anode, showing that there are  $\text{SnO}_2$  reacting with Li at the second and the following cycles.

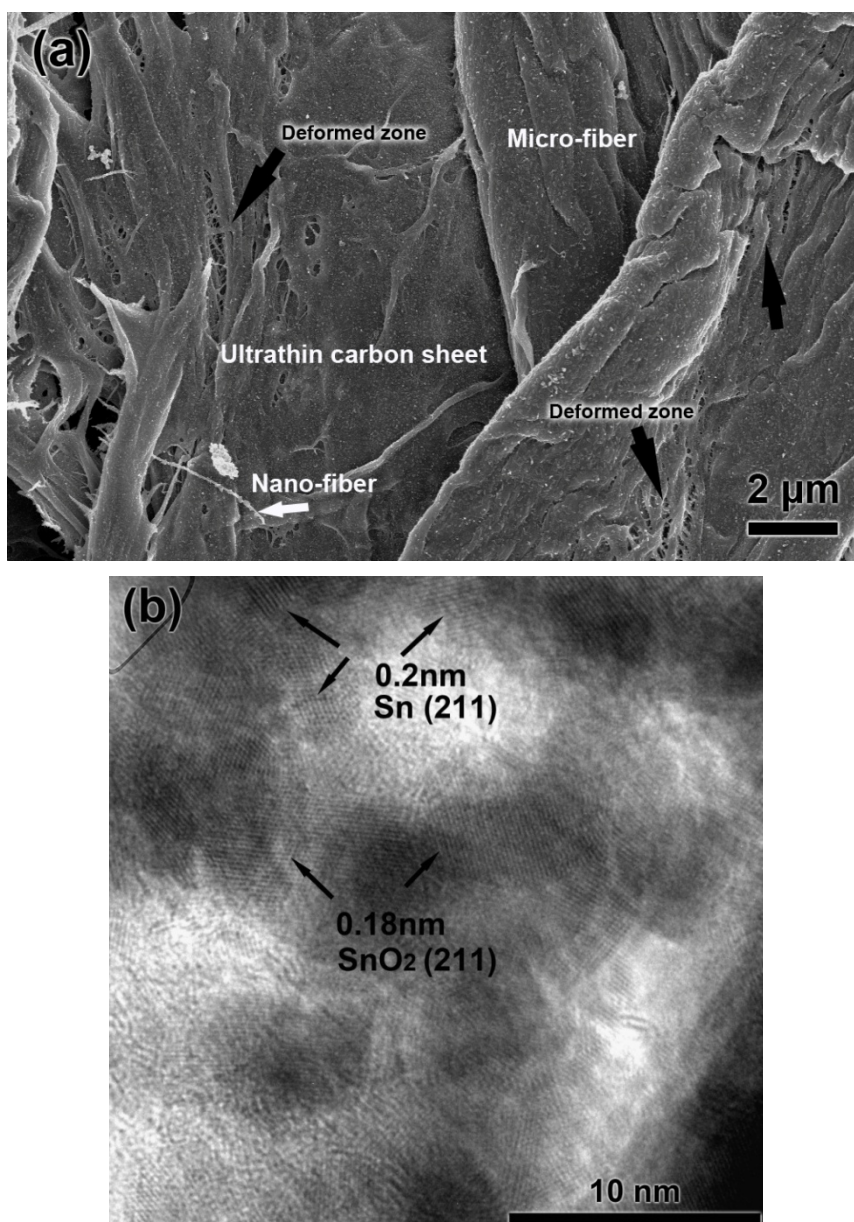

**Figure S9.** (a) SEM image, (b) HRTEM image of the binder-free  $\text{SnO}_2\text{NC@CFP}$  after cycling 150 cycles at  $0.25 \text{ Ag}^{-1}$ . It had been found that the interconnected 3D porous structure was maintained in the hybrid sheets after 150 discharge-charge cycles. However, there were obvious deformation zones inside the 1D and 2D fibrous carbon scaffolds, where a part of the carbon had been divided to form many nanosized fibers. The HRTEM image revealed the existence of  $\text{SnO}_2$  /Sn nanocrystals in carbon matrix.
